1 **Proxy-based model to assess the relative contribution of**  
2 **ballast water and biofouling’s potential propagule pressure**  
3 **and prioritize vessel inspections**

4  
5 **SHORT TITLE: Proxy-based model to assess potential**  
6 **propagule pressure**

7  
8 **Authors:**

9 Lina Ceballos-Osuna<sup>1\*</sup>, Chris Scianni <sup>1</sup>, Maurya Falkner <sup>1</sup>, Raya Nedelcheva <sup>1</sup>, Whitman  
10 Miller <sup>2</sup>

11  
12 <sup>1</sup> Marine Invasive Species Program, California State Lands Commission, Sacramento,  
13 CA, 95825, USA

14 <sup>2</sup> Smithsonian Environmental Research Center, Edgewater MD, 21037, USA

15 \*Corresponding Author:

16 E-mail: [lina.ceballos@slc.ca.gov](mailto:lina.ceballos@slc.ca.gov)

17  
18 **Abstract:**

19 Commercial shipping is the primary pathway of introduction for aquatic nonindigenous  
20 species, mainly through the mechanisms of ballast water and biofouling. In response to

21 this threat, regulatory programs have been established across the globe to regulate and  
22 monitor commercial merchant and passenger vessels to assess compliance with local  
23 requirements to reduce the likelihood of NIS introductions. Resource limitations often  
24 determine the inspection efforts applied by these regulatory agencies to reduce NIS  
25 introductions. We present a simple and adaptable model that prioritizes vessel arrivals  
26 for inspection using proxies for potential propagule pressure, namely a ships' wetted  
27 surface area as a proxy for the likelihood of biofouling-mediated potential propagule  
28 pressure and ballast water discharge volume as a proxy for ballast water-mediated  
29 potential propagule pressure. We used a California-specific dataset of vessels that  
30 arrived at California ports between 2015 and 2018 to test the proposed model and  
31 demonstrate how a finite set of inspection resources can be applied to target vessels  
32 with the greatest potential propagule pressure. The proposed tool is adaptable by  
33 jurisdiction, scalable to different segments of the vessel population, adjustable based on  
34 the vector of interest, and versatile because it allows combined or separate analyses of  
35 the PPP components. The approach can be adopted in any jurisdiction across the  
36 globe, especially jurisdictions without access to, or authority to collect, risk profiling data  
37 or direct measurements for all incoming vessel arrivals.

38

## 39 **Introduction**

40 Commercial shipping is the primary pathway of introduction for aquatic nonindigenous  
41 species (NIS) that have established within coastal and estuarine waters globally [1- 4].  
42 Commercial vessels transport NIS from one location to another through the uptake and

43 discharge of ballast water and as a result of biofouling associated with the submerged  
44 portions of the hull, or the vessel's wetted surface area (WSA) [5- 7].

45

46 Ballast water is taken on board a vessel for trim and stability purposes and to offset the  
47 mass imbalance of the vessel during cargo loading and unloading operations. However,  
48 when ballast water is taken on board in one location, planktonic communities are  
49 inadvertently entrained, along with sediments and benthic biota that may have been  
50 suspended in the water column by vessel activity. NIS are released when the ballast  
51 water is eventually discharged in another port.

52

53 Biofouling refers to the biota attached to, or associated with, the submerged portions of  
54 a vessel (i.e., the WSA) [8]. Biofouling organisms can be sessile or mobile, and range in  
55 size from microscopic bacterial biofilms to larger macrofauna. These organisms can  
56 either cling to the vessel's wetted surfaces (e.g., biofilms, barnacles, bivalves,  
57 bryozoans, algae) or find refuge in internal cavities where they are protected from shear  
58 forces at the hull-water interface (e.g., mobile crustaceans, fish). The biofouling  
59 communities travel wherever the vessel travels, transporting organisms to new ports  
60 and places. These biofouling organisms can be released as adults, larvae, or other  
61 propagules, either through physical forces such as the hull rubbing on a pier piling or  
62 displacement from an activated bow thruster, or by natural release and spawning.

63

64 In response to the biosecurity threat posed by commercial shipping, jurisdictions across  
65 the globe have established (or are in the process of establishing) regulatory programs

66 tasked with reducing the likelihood of NIS introductions via ballast water and biofouling  
67 (e.g., California’s Marine Invasive Species Program). Each of these local, state, federal,  
68 and international programs have the goal of implementing ballast water or biofouling  
69 management requirements/regulations to prevent species introductions in their  
70 respective jurisdictions. A critical element of these efforts is a robust outreach and  
71 inspection program to assess and improve compliance. Active communication between  
72 regulators (e.g., Port State Control) and a vessel’s crew is the most straightforward way  
73 of getting location-specific requirements into the hands of the people directly  
74 responsible for ballast water and biofouling management actions. Ideally, all arriving  
75 vessels would be boarded for outreach and inspection, but resource limitations such as  
76 staffing levels and funding often require regulatory agencies to make decisions about  
77 which vessels to board and which vessels to bypass. How agencies allocate their  
78 limited resources to inspections can vary along a spectrum from arbitrary to deliberate.  
79 Using a standardized, data-driven prioritization approach designed for conditions  
80 specific to each jurisdiction could greatly improve the decision-making process.

81  
82 A variety of risk-based vessel prioritization approaches have been described in recent  
83 years [9- 11], typically with the goal of assessing the likelihood of a vessel introducing  
84 NIS through ballast water or biofouling. Such approaches and their reliability differ  
85 depending on the quantity and quality of input data available (Fig 1). Agencies with  
86 detailed and readily accessible data on ballast water and/or biofouling operational and  
87 maintenance practices, or with detailed source and recipient port information, are in the  
88 strongest position to use intricate risk-based prioritization approaches for boarding and

89 inspecting vessels to assess compliance. However, other approaches based on  
90 available proxies can also be useful when detailed vessel operational or environmental  
91 matching data are limited or not readily accessible.

92

93 **Fig 1. Conceptual approaches for risk-based prioritization.**

94 Reliability of an approach is dependent on the quantity and quality of available  
95 resources. Direct measurement approaches may rely on physical sampling of ballast  
96 water, surveying of a vessel's wetted surface area, or similar methods. Risk profiling  
97 approaches may rely on environmental matching, vessel operational profile, or other  
98 similar methods. Proxy-based approaches may rely on ballast water discharge volumes  
99 and wetted surface area as potential propagule pressure parameters, or other  
100 appropriate measurements.

101

102 In this paper, we present a proxy-based model that prioritizes vessel arrivals for  
103 inspection using fundamental information about ships' WSA and BWD volumes to  
104 enable agencies to make more protective data-driven decisions when resources are  
105 limiting.

106

107 Despite the low numbers of empirical studies able to prove the direct relationship  
108 between vector activity and invasion success [12], the positive relationship between  
109 propagule supply (e.g., the release of organisms in ballast water discharged or from the  
110 WSA of the vessel) and the likelihood of introductions is well recognized [13, 14]. Based  
111 on the assumptions that ballast water and biofouling are managed consistent with local

112 requirements and that the likelihood of introduction increases with increasing propagule  
113 supply (also recognizing the uncertainty of translating proxy-based parameters into  
114 invasion success, [12, 15]), we present a reliable and simplified alternative model to  
115 prioritize vessel arrivals based on potential propagule supply (i.e., potential propagule  
116 pressure, PPP) for jurisdictions with limited resources.

117

118 The model is based on PPP proxies, as described in Lo et al. [16], that are readily  
119 available to most jurisdictions. The proxies used in this approach are BWD volume as a  
120 proxy for ballast water PPP and WSA as a proxy for biofouling PPP. The targeted users  
121 for this approach are jurisdictions that do not have access to detailed vessel operational  
122 or environmental matching data between source and recipient ports, or that do not have  
123 the capacity and time to make direct measurements.

124

125 An additional benefit of this model is that it allows for identification of the relative  
126 pressure of each component of the overall PPP, either combined or independently (e.g.,  
127 by location, vessel type, and/or vector). From a management perspective, it could be  
128 particularly useful when assessing cumulative supply pressure across different ports to  
129 guide decisions about where limited resources should be allocated and target those  
130 ports that proportionally receive the greatest PPP.

131

132 To test the proposed model, we used a California-specific dataset from vessels that  
133 arrived at California ports between 2015 and 2018 (S1 Dataset) and compared with  
134 California's current prioritization scheme that allocates available resources to meet the

135 legislative mandate of inspecting 25% of the vessels arriving at California ports to  
136 assess compliance with California's ballast water and biofouling management  
137 requirements.

138

## 139 **Methods**

### 140 **Wetted surface area**

141 The use of WSA as a proxy for PPP relies on the assumption that the likelihood of  
142 introduction increases as the area of colonizable surface, including niche areas (e.g.,  
143 sea chests, rudders), increases. We used the same vessel dataset as Miller *et al.* [7],  
144 where the WSA for 373,833 vessel arrivals at United States ports was calculated using  
145 the WSA equation and the coefficients reported by Van Maanen and Van Oossanen  
146 [17]. A relationship between WSA and Gross Tonnage (GT) was established via  
147 regression analysis (Table 1) for each of the following vessel-types: General Cargo,  
148 Passenger, RO-RO (Auto carriers), Bulker, Container, and Tanker. GT was used here,  
149 rather than Net Tonnage as used by Miller *et al.* [7], because it is a more readily  
150 available metric and to match with an existing California-specific vessel dataset used to  
151 trial the model. Unmanned barges (including their respective tug) and articulated tug-  
152 barges (ATB) were not included in the regression analysis due to the variability within  
153 these groups, but their WSA was calculated directly for each vessel following Van  
154 Maanen and Van Oossanen [17] coefficients.

155

156 **Table 1. Calculation of wetted surface area.** Regression models for specific vessel  
 157 types used to estimate the wetted surface area (WSA) from gross tonnage (GT). Niche  
 158 proportion [18] represents the fraction of a vessel's WSA that is accounted for by niche  
 159 areas (e.g., sea chests, rudders).

|                          | Regression Equation*              | n**  | r <sup>2</sup> | Niche Proportion (N <sub>p</sub> ) |
|--------------------------|-----------------------------------|------|----------------|------------------------------------|
|                          | $WSA = m(GT)^b$                   |      |                |                                    |
| General                  | WSA=20.02(GT) <sup>0.5728</sup>   | 4172 | 0.907          | 0.09                               |
| Passenger                | WSA =5.46 (GT) <sup>0.6951</sup>  | 2659 | 0.996          | 0.27                               |
| RO-RO                    | WSA =25.04 (GT) <sup>0.5309</sup> | 1929 | 0.901          | 0.09                               |
| Bulker                   | WSA =15 (GT) <sup>0.6294</sup>    | 8804 | 0.988          | 0.07                               |
| Container                | WSA =10.66 (GT) <sup>0.6501</sup> | 3065 | 0.984          | 0.09                               |
| Tanker                   | WSA =17.57 (GT) <sup>0.6105</sup> | 8292 | 0.988          | 0.08                               |
| ATB                      | <i>Calculated per vessel</i>      |      |                | 0.033 (barge) + 0.25<br>(tug)      |
| Unmanned<br>barges + Tug | <i>Calculated per vessel</i>      |      |                | 0.033 (barge) + 0.25<br>(tug)      |

160 \*Regressions are based on first order of polynomial relationships. *m*= slope, *b*= intercept

161 \*\* Number of vessels used in the regression model

162

163 In addition to creating regression equations to estimate WSA using GT, we also applied  
 164 the estimated proportion of a vessel's WSA accounted for by niche areas, as reported  
 165 by Moser *et al.* [18] for each vessel type (Table 1). Niche proportions for ATBs and  
 166 unmanned barges and their tugs were also estimated using specific niche area values  
 167 reported by Moser *et al.* [18] and adding all niche areas expected for typical ATBs,



168 unmanned barges, and tugs (K. Reynolds, *pers comm*, 2020). These two metrics,  
169 estimated WSA and niche proportion ( $N_p$ ), can be used to calculate total WSA (TWSA)  
170 using equation 1:

$$171$$
$$172 \quad TWSA = WSA (1 + N_p)$$

173 (1)

174 (see supplementary material for the step-by-step process (S2), the R script (S3), and  
175 the data frame template (S4) to calculate TWSA)

176

## 177 **Ballast water discharge volume**

178 The use of BWD volume as a proxy for PPP relies on the assumptions that propagule  
179 supply increases as BWD volume increases [16] and that management is consistently  
180 applied in compliance with local requirements. We recognize the limitations that this  
181 assumption may have when trying to predict invasion success [12, 14, 15], however, our  
182 intent is not to measure probability of species establishment. Instead, our intention is to  
183 rely on the positive relationship between BWD volume and propagule supply [12, 13] to  
184 prioritize limited resources with the goal of assessing vessel compliance to reduce the  
185 likelihood of introduction using readily available information.

186

187 BWD volume data are available to most jurisdictions in the form of ballast management  
188 reporting for each vessel arrival. In the U.S., the National Ballast Information  
189 Clearinghouse (NBIC) provides vetted BWD and management information for all U.S.  
190 arrivals to State and Territorial agencies via an online public data portal

191 (<https://nbic.si.edu/>). Other factors like water origin, environmental matching between  
192 source and recipient waters, and management strategy also influence NIS introductions.  
193 However, this information is not readily available in most cases, and can be complex  
194 and challenging to analyze. As resources increase, additional factors can be included to  
195 improve reliability of the analysis (Fig 1).

196

## 197 **Potential propagule pressure (PPP): Combined influence of** 198 **ballast water discharge and biofouling**

199 We describe a proxy-based model to calculate PPP scores using TWSA and BWD  
200 volume to prioritize vessel arrivals for inspection, targeting vessels that are more likely  
201 to introduce NIS at a specific location, assuming that all vessels have managed  
202 consistent with local requirements. This approach can also help identify the ports that  
203 receive more PPP due to the frequency of arrivals.

204

205 For jurisdictions that have minimal resources to accomplish this, individual vessel PPP  
206 scoring will allow a simple prioritization scheme specifically designed for their own  
207 population of vessels. The process requires a representative number of historical  
208 arrivals (e.g., one month, one year, multiple years, referred to as “Population data” in  
209 S4) to identify the maximum individual vessel value of both TWSA (i.e.,  $maxTWSA_{ind}$ ),  
210 calculated using the regression equations in Table 1 for each vessel type and Equation  
211 1, and BWD (i.e.,  $maxBWD_{ind}$ ) from vessel reported data. A PPP score for each new

212 vessel arrival can then be calculated using the estimated TWSA (i.e.,  $TWSA_{ind}$ ) and the  
213 BWD volume (i.e.,  $BWD_{ind}$ ) specific for that arrival as the input values in Equation 2.

214

$$215 \quad PPP \text{ Score}_{ind} = \left( \frac{BWD_{ind}}{\max BWD_{ind}} \right) + \left( \frac{TWSA_{ind}}{\max TWSA_{ind}} \right)$$

216 (2)

217 (see the R script provided in S3 to calculate PPP score)

218 Each vessel arrival will have an individual vessel PPP score that can be used to sort  
219 and prioritize arrivals relative to the other vessels in the population.

220

## 221 **PPP scores – Component parts and cumulative scores**

222 The relative contribution of each PPP component (i.e., ballast water and biofouling) can  
223 be calculated separately using either of the parenthetical components on the right-hand  
224 side of Equation 2. The overall influence of either ballast water or biofouling on PPP  
225 over time (i.e., incorporating frequency of arrival) or geographical region (i.e.,  
226 incorporating all arrivals for specific ports) can then be added appropriately. Similarly,  
227 the total PPP score can be added cumulatively across a region or over certain time  
228 periods to compare between ports or over time. Likewise, cumulative scores can be  
229 assessed by vessel type or a myriad of other categories.

230

231 Because conducting management to meet local requirements is considered the first  
232 layer to reduce the likelihood of NIS introductions, the proposed approach assumes that  
233 each jurisdiction already has voluntary or mandatory management requirements for  
234 both ballast water (e.g., ballast water exchange or ballast water treatment systems to

235 meet discharge performance standards) and biofouling (e.g., antifouling coatings) in  
236 place. All vessels evaluated under the PPP proxy-based prioritization scheme are  
237 assumed to be compliant with local management requirements; if they are not, they  
238 should be automatically categorized as high priority for inspection independent of the  
239 estimated PPP.

240

## 241 **Model trial using California data**

242 We used data from four years of arrivals at California ports (2015-2018, S1 dataset) to  
243 trial the proposed model (For clarification, this proposed approach is not the current  
244 vessel inspection prioritization scheme used in California). BWD volume data were  
245 obtained from Ballast Water Management Reports submitted to the California State  
246 Lands Commission and vessel arrival data were obtained from the Marine Exchanges of  
247 Southern California and the San Francisco Bay Region.

248

## 249 **PPP scoring by individual vessel - California**

250 Using the TWSA and BWD volume data for each arriving vessel during the first three  
251 years of our dataset (2015-2017), we identified the maximum values for BWD (i.e.,  
252  $\max BWD_{ind}$ ) and TWSA (i.e.,  $\max TWSA_{ind}$ ) for future use in Equation 2. We then used the  
253 TWSA and BWD volume data for each arriving vessel during the final year of our  
254 dataset (2018) in Equation 2 with the maximum values identified earlier. These  
255 calculations produced individual vessel PPP scores for each arrival during 2018 to

256 evaluate how vessels would be prioritized daily according to each arriving vessel's  
257 relative PPP.

258

259 Currently, California has a mandate to inspect at least 25% of all arrivals, corresponding  
260 to an average of 6 vessels inspected per day. Using this number as the target for high  
261 priority arrivals to inspect (and representing the resources available for the trial), we  
262 identified the 6 greatest PPP scores per day and analyzed how each vessel type would  
263 be represented under the arrivals prioritized for inspection.

264

### 265 **Cumulative PPP scores (by location and vessel type)**

266 To demonstrate how cumulative PPP scores can be used to inform the distribution of  
267 resources, we added all 2018 PPP scores by vessel type and by port.

268

## 269 **Results**

### 270 **Model results using California data**

#### 271 **PPP scores by individual vessel in California**

272 Each component of the individual vessel PPP score (i.e., the two parenthetical values  
273 on the right-hand side of Equation 2) is expected to produce unitless values within the  
274 range between 0 and 1. Therefore, the combined PPP score<sub>ind</sub> for each vessel is  
275 expected to range between 0 and 2. California's 2018 dataset produced individual  
276 vessel PPP scores ranging from 0.1 to 1.5. Passenger ( $0.60 \pm 0.005$  SE) and Container  
277 ( $0.55 \pm 0.003$  SE) vessels accounted for the greatest mean PPP scores, whereas

278 General cargo vessels ( $0.22 \pm 0.007$  SE) and Unmanned Barges ( $0.11 \pm 0.001$  SE)  
279 exhibited the lowest mean values (Fig 2).

280

281 **Fig 2. Frequency of PPP scores by vessel type.**

282 PPP score calculated for each vessel arriving at California ports during 2018 using the  
283 proposed proxy-based method to assess the combined effect of both biofouling and  
284 ballast water and the likelihood of species introductions associated to each arrival. Red  
285 line and numbers represent the mean PPP score for each vessel type. The PPP score  
286 ranges from 0 (lowest perceived likelihood of invasion) to 2 (highest perceived likelihood  
287 of invasion).

288

289 When evaluating how the PPP score could have been used to prioritize inspections on a  
290 daily basis over the entire set of 2018 arrivals (using the legislative mandate to inspect  
291 25% of arrivals as a resources threshold to categorize high priorities), California would  
292 have prioritized container (57.2% of all high priorities), tank (20.9%), bulk (11.0%) and  
293 passenger (10.0%) vessels (Table 2). These vessel types presented the highest PPP  
294 scores daily, reflecting the large volumes of ballast water frequently discharged by these  
295 vessels in combination with their large TWSA values.

296

297 When comparing the trial results of the proposed model with the actual California vessel  
298 inspection prioritization method used during 2018 (based on ballast water-related risk,  
299 outreach opportunities, and compliance history), the proposed prioritization scheme  
300 would have resulted in more container and passenger vessels categorized as high

301 priority for inspection and fewer (including zero in some cases) bulk, tank, general, ATB,  
302 RO-RO, and unmanned barges (Table 2). These differences were expected because  
303 the approach used in California in 2018 relied on additional factors and resources,  
304 allowing a more reliable and refined assessment that resulted in a broader distribution  
305 of inspections across vessel types (Fig. 1)

306

307 In the trial, the proposed prioritization scheme assumes that the greatest 6 individual  
308 PPP scores per day will be prioritized as high priority for inspection, regardless of  
309 whether the same vessel makes repeated visits. Other jurisdictions that use this  
310 approach should decide how often to inspect vessels that frequently arrive and maintain  
311 a good compliance record. For example, we reexamined our dataset to only include the  
312 first high priority arrival for each vessel during 2018. All other arrivals from the same  
313 vessel were removed from prioritization to avoid repeatedly inspecting the same  
314 vessels. This resulted in a severely reduced number of unique container, tank, and  
315 passenger vessels categorized as a high priority (Table 2). Reducing the number of  
316 high priorities in these groups, would release additional resources that could be used to  
317 include other components in the prioritization scheme (e.g., outreach).

318

319 **Table 2. Comparison of prioritization schemes:** Vessels identified as high priority  
320 using the proposed PPP-based prioritization model (Projected) and actual vessels  
321 prioritized as high priority for inspection during 2018 using the existing California  
322 prioritizing scheme that relies on more resources and allows a more refined assessment  
323 as described in Fig 1.

|              | High priorities based on California's prioritization in 2018 |                          | Projected high priorities (25% of total arrivals) based on PPP score |                          |
|--------------|--------------------------------------------------------------|--------------------------|----------------------------------------------------------------------|--------------------------|
|              | Number of arrivals (unique vessels)                          | % of all high priorities | Number of arrivals (unique vessels)                                  | % of all high priorities |
| ATB          | 24 (6)                                                       | 1.8                      | 0                                                                    | 0*                       |
| Barge+Tug    | 39 (6)                                                       | 2.9                      | 0                                                                    | 0*                       |
| Bulk         | 472 (348)                                                    | 34.7                     | 240 (123)                                                            | 11.0*                    |
| Container    | 130 (106)                                                    | 9.6                      | 1253 (271)                                                           | 57.2                     |
| General      | 85 (76)                                                      | 6.3                      | 1 (1)                                                                | 0*                       |
| Passenger    | 37 (20)                                                      | 2.7                      | 238 (21)                                                             | 10.9                     |
| RO-RO        | 123 (92)                                                     | 9.0                      | 0                                                                    | 0*                       |
| Tank         | 450 (285)                                                    | 33.1                     | 458 (152)                                                            | 20.9*                    |
| <b>Total</b> | <b>1360 (939)</b>                                            |                          | <b>2190 (568)</b>                                                    |                          |

324 \*Indicates the vessel types that would have resulted in a decrease in their relative proportion of the  
 325 overall high priorities when using the proposed model instead of the actual approach used.

326

### 327 **Cumulative PPP scores (by location or vessel type)**

328 Cumulative PPP scores calculated during the trial showed that the Los Angeles/Long  
 329 Beach port complex and the Port of Oakland received the greatest PPP (Fig 3),  
 330 primarily because of the frequency of containers and tank vessels that arrive at these  
 331 ports.

332

### 333 **Fig 3. Cumulative PPP score observed in California during 2018.**

334 Bars represent the contribution of total wetted surface area (TWSA; blue) and ballast  
 335 water discharge (BWD; green) to the combined cumulative score at all locations  
 336 (horizontal) and all the different vessel types (vertical). Bubble size represents the  
 337 cumulative score ranging from 1116.8 (largest bubble) to <1 (smallest bubble).

338



339 Across all ports and vessel types, TWSA outweighed BWD as a factor in the overall  
340 PPP scores, with BWD contributing to the scores primarily for tank and bulk vessels (Fig  
341 3), reflecting the fact that only approximately 15% of all arrivals in California discharge  
342 ballast water [19].

343

## 344 **Discussion**

345 The proxy-based model described here is a data-driven tool to prioritize ballast water  
346 and biofouling inspections of commercial merchant and passenger vessels. The  
347 approach is:

- 348 • Adaptable because it can be applied within any jurisdiction and relies on the  
349 specific characteristics of that jurisdiction's vessel population
- 350 • Scalable because it can be adjusted to capture different segments of the vessel  
351 population (e.g., 10%, 15%, 25% of the arriving vessels)
- 352 • Adjustable because it can be altered to focus specifically on either ballast water  
353 or biofouling instead of taking a combined approach
- 354 • Versatile because scores can be added within groups (e.g., vessel types,  
355 different ports) or over time periods to differentiate the relative PPP within these  
356 groupings
- 357 • Simple because it can be set up in minutes and provide data-driven prioritization  
358 with only two readily available input values per arriving vessel

359

360 In the described form, this model is ideal for programs that regulate the management of  
361 both ballast water and biofouling as it considers the combined effect of proxies for both.

362 However, it can be altered into separate or standalone prioritization approaches for  
363 programs that are primarily interested in only ballast water (e.g., some U.S. states) or  
364 biofouling (e.g., GloFouling Partnerships member countries). The approach also  
365 provides jurisdictions with a tool to determine the most efficient use of limited inspection  
366 resources on a daily basis or after a retrospective analysis of the patterns. Daily arrivals  
367 can be prioritized to ensure the inspection of vessels most likely to introduce NIS  
368 (assuming compliance with local management requirements) when additional data are  
369 unavailable. More efficient geographic allocation of inspection resources across multiple  
370 ports or regions can also be determined after analyzing the patterns of cumulative  
371 proxy-based PPP in these areas.

372

373 This proxy-based model relies on knowing each arriving vessel's BWD volume and  
374 gross tonnage, both readily available to most jurisdictions. Most regulatory programs  
375 require submission of ballast water source, management, and discharge activity. In the  
376 U.S., vessels are required to submit the Ballast Water Management Report (BWMR) to  
377 the NBIC for every arrival at a U.S. port. Under the 2018 Vessel Incidental Discharge  
378 Act, the NBIC now makes all electronically submitted BWMRs (approx. 99.5% of  
379 submissions) available to state programs immediately upon receipt at NBIC, prior to  
380 arrival in most cases.

381

382 Vessel gross tonnage data are accessible at many free vessel information websites  
383 (e.g., vesselfinder.com) and can be used with the regression equations presented here,  
384 specific to each vessel type (see Table 1), to estimate WSA. The inclusion of niche area

385 WSA in TWSA provides a more realistic proxy for biofouling PPP, as niche areas are  
386 known hotspots for biofouling accumulation [18, 20, 21].

387

388 Our trial of the proxy-based model with a dataset of California vessel arrivals  
389 demonstrates the utility of the method. To meet California's legislative mandate to  
390 inspect at least 25% of arriving vessels, the trial using the proxy-based prioritization  
391 scheme focused inspections on container, tank, passenger, and bulk vessels. All of  
392 these vessels either frequently discharge ballast water in California and/or have large  
393 TWSA. When compared to the vessels actually categorized as a high priority in  
394 California during 2018 (based on outreach opportunities, compliance history, and BWD),  
395 the proposed model de-emphasized inspection of bulk and tank vessels and excluded  
396 ATBs, barges, auto carriers, and general cargo vessels from the high priorities. Even  
397 though compliance history was not included in this trial, it is important to emphasize that  
398 California's prioritization process considers compliance with state requirements a critical  
399 part of the risk assessment process, as well as other factors like outreach.

400

401 The trial also verified the usefulness of using cumulative PPP scores for different ports  
402 to demonstrate how inspection resources can be allocated to those areas exposed to  
403 the greatest likelihood of introduction. This is especially useful for jurisdictions with ports  
404 separated geographically where the same set of inspectors cannot cover all ports.

405

406 The proxy-based model presented here is a baseline method that, in the absence of  
407 more detailed data, allows the detection of those vessels that may have the greatest

408 likelihood of introducing NIS. The model assumes that management of both vectors has  
409 been performed according to the local requirements as the first layer of protection  
410 against NIS introductions. In addition, this approach does not consider opportunities for  
411 outreach as part of the prioritization process nor does it highlight the value of inspecting  
412 lower-scoring arrivals (e.g., for violation follow-up, or distribution of information to new  
413 vessels). These are important additional considerations that should be included in any  
414 prioritization scheme when possible. The flexibility of this method allows each  
415 jurisdiction to define outreach, compliance, or frequency rules (e.g., target new vessels,  
416 decrease inspection frequency in response to compliance history, suspicion of potential  
417 violations) that can be incorporated into the prioritization approach to reach a more  
418 comprehensive distribution of the inspection efforts. The approach also provides the  
419 opportunity for each jurisdiction to focus more attention (efforts) on ballast water or  
420 biofouling, depending on their priorities.

421

## 422 **Conclusion**

423 The proxy-based prioritization model presented and trialed here is an adaptable,  
424 scalable, adjustable, versatile, and simple tool to rapidly identify a subset of vessels for  
425 ballast water and/or biofouling inspections. The approach can be adopted globally, and  
426 is especially useful for jurisdictions without access to, or authority to collect, risk profiling  
427 data or direct measurements for all incoming arrivals (Fig 1).

428

## 429 **Acknowledgments**

430 Nicole Dobroski, Jonathan Thompson, Michelle Pelka, and Susie Kropman reviewed  
431 draft versions of the manuscript. Jackie Mackay, Dalia Keroles, Craig Fultz, Pearl Tan,  
432 Nadia Day, Michelle Pelka, Eric Frisbee, Paulette Boyd, Mary Fakih, Blanca Garcia,  
433 Michele Wiebold contributed with the data management of the California dataset. Kevin  
434 Reynolds contributed with valuable information and knowledge about vessel  
435 engineering for the WSA calculations.

436

## 437 **References**

- 438 1. Ruiz, GM, Carlton JT, Grosholz ED, Hines AH. Global invasions of marine and  
439 estuarine habitats by non-indigenous species: Mechanisms, extent, and  
440 consequences. *Am Zool.* 1997; 37(6): 621-632.
- 441
- 442 2. Hewitt C, Campbell M. The relative contribution of vectors to the introduction and  
443 translocation of invasive marine species. Produced for the Australian  
444 Government. 2010, 56
- 445
- 446 3. Ruiz, GM, Fofonoff PW, Steves BP, Carlton JT. Invasion history and vector  
447 dynamics in coastal marine ecosystems: A North American perspective. *Aquat*  
448 *Ecosyst Health Manag.* 2015; 18(3):299-311.
- 449
- 450 4. Ricciardi A. Tracking marine alien species by ship movements. *Proc. Natl. Acad.*  
451 *Sci. USA.* 2016, 113(20): 5470-5471.

452

453 5. Bailey S. An overview of thirty years of research on ballast water as a vector for  
454 aquatic invasive species to freshwater and marine environments. *Aquat Ecosyst*  
455 *Health Manag.* 2015; 18(3): 261-268.

456

457 6. Davidson I, Scianni C, Minton MS, Ruiz GM. A history of ship specialization and  
458 consequences for marine invasions, management and policy. *J Appl Ecol.* 2018;  
459 55:1799-1811.

460

461 7. Miller AW, Davidson, IC, Minton MS, Steves B, Moser CS, Drake LA, et al.  
462 Evaluation of wetted surface area of commercial ships as biofouling habitat flux  
463 to the United States. *Biol. Invasions.* 2018.

464

465 8. Minchin D, Gollasch S. Fouling and Ships' Hulls: How Changing Circumstances  
466 and Spawning Events may Result in the Spread of Exotic Species. *Biofouling.*  
467 2003, 19:111-122.

468

469 9. Barry SC, Hayes KR, Hewitt CL, Behrens HL, Dragsund E, Bakke SM. Ballast  
470 water risk assessment: principles, processes, and methods. *ICES Journal of*  
471 *Marine Science.* 2008; 65(2): 121-131.

472

473 10. Keller RP, Drake JM, Drew MB, Lodge DM. Linking environmental conditions and  
474 ship movements to estimate invasive species transport across the global  
475 shipping network. *Divers Distrib.* 2010, 17:1, 93-102.

476  
477 11. Verna DE, Rueb RR, Gantz CA, Gala GT, Green J, Zalusky JA, et al. A decision  
478 tree analysis of nonindigenous species risk from ballast water to the lower  
479 Columbia River and Oregon coast, USA. *Manag Biol Inv.* 2018; 9 (3); 309-321.  
480 doi: <https://doi.org/10.3391/mbi.2018.9.3.13>

481  
482 12. Drake DAR, Monroy-Casas O, Koops MA, Bailey SA. Propagule pressure in the  
483 presence of uncertainty: extending the utility of proxy variables with hierarchical  
484 models. *Methods in Ecology and Evolution.* 2015, 6: 1363-1371.

485  
486 13. Drake J, Jerde C. Stochastic models of propagule pressure and establishment.  
487 2009, Pp. 83–102 In: *Bioeconomics of Invasive Species.* R. Keller, D. Lodge.

488  
489 14. Wonham JM, Byers JE, Grosholz ED, Leung B. Modeling the relationship  
490 between propagule pressure and invasion risk to inform policy management.  
491 *Ecological Applications.* 2013, 27:3, 1691-1706

492

- 493 15. National Research Council. Assessing the Relationship Between Propagule  
494 Pressure and Invasion Risk in Ballast Water. Washington, DC: The National  
495 Academies Press. 2011, <https://doi.org/10.17226/13184>.
- 496
- 497 16. Lo VB, Levings CD, Chan KMA. Quantifying potential propagule pressure of  
498 aquatic invasive species from the commercial shipping industry in Canada. *Mar*  
499 *Pollut Bull.* 2012; 64(2012): 295-302.
- 500
- 501 17. Van Maanen JD, Van Oossanen P. Resistance. In: Lewis EV (ed) Principles of  
502 naval architecture, volume II. The Society of Naval Architects and Engineers.  
503 1988; 1-93.
- 504
- 505 18. Moser CS, Wier TP, First MR, Grant JF, Riley SC, Robbins-Wamsley SH, et al.  
506 Quantifying the extent of niche areas in the global fleet of commercial ships: the  
507 potential for “super-hot spots” of biofouling. *Biol Invasions.* 2017; 19:1745-1759.  
508 doi: 10.1007/s10530-017-1386-4
- 509
- 510 19. Commission. 2021 Biennial Report on the California Marine Invasive Species  
511 Program. Produced for the California State Legislature. California State Lands  
512 Commission, Marine Environmental Protection Division, 2021
- 513



514 20. Coutts ADM, Moore KM, Hewitt CL. Ships' sea-chests: an overlooked transfer  
515 mechanism for non-indigenous marine species? Mar Pollut Bull. 2003; 46: 1504-  
516 1515.

517

518 21. Davidson I, Scianni C, Hewitt C, Everett R, Holm E, Tamburri M, et al. Mini-  
519 review: Assessing the drivers of ship biofouling management - aligning industry  
520 and biosecurity goals. Biofouling. 2016; 32:4, 411-428.

521

## 522 **Supporting Information**

523 **S1 Dataset.** California vessels arrivals from 2015 to 2018

524 **S2 Flowchart.** Step-by-step process to use the proposed approach.

525 **S3 Script.** R Script to calculate TWSA and PPP score using the proposed approach.

526 **S4 Data frame template.** Excel data frame template to input "Population Data" and  
527 "Arrivals data".

528 **S5 Script.** R Script used to generate the figures for a visual analysis of the data.

529

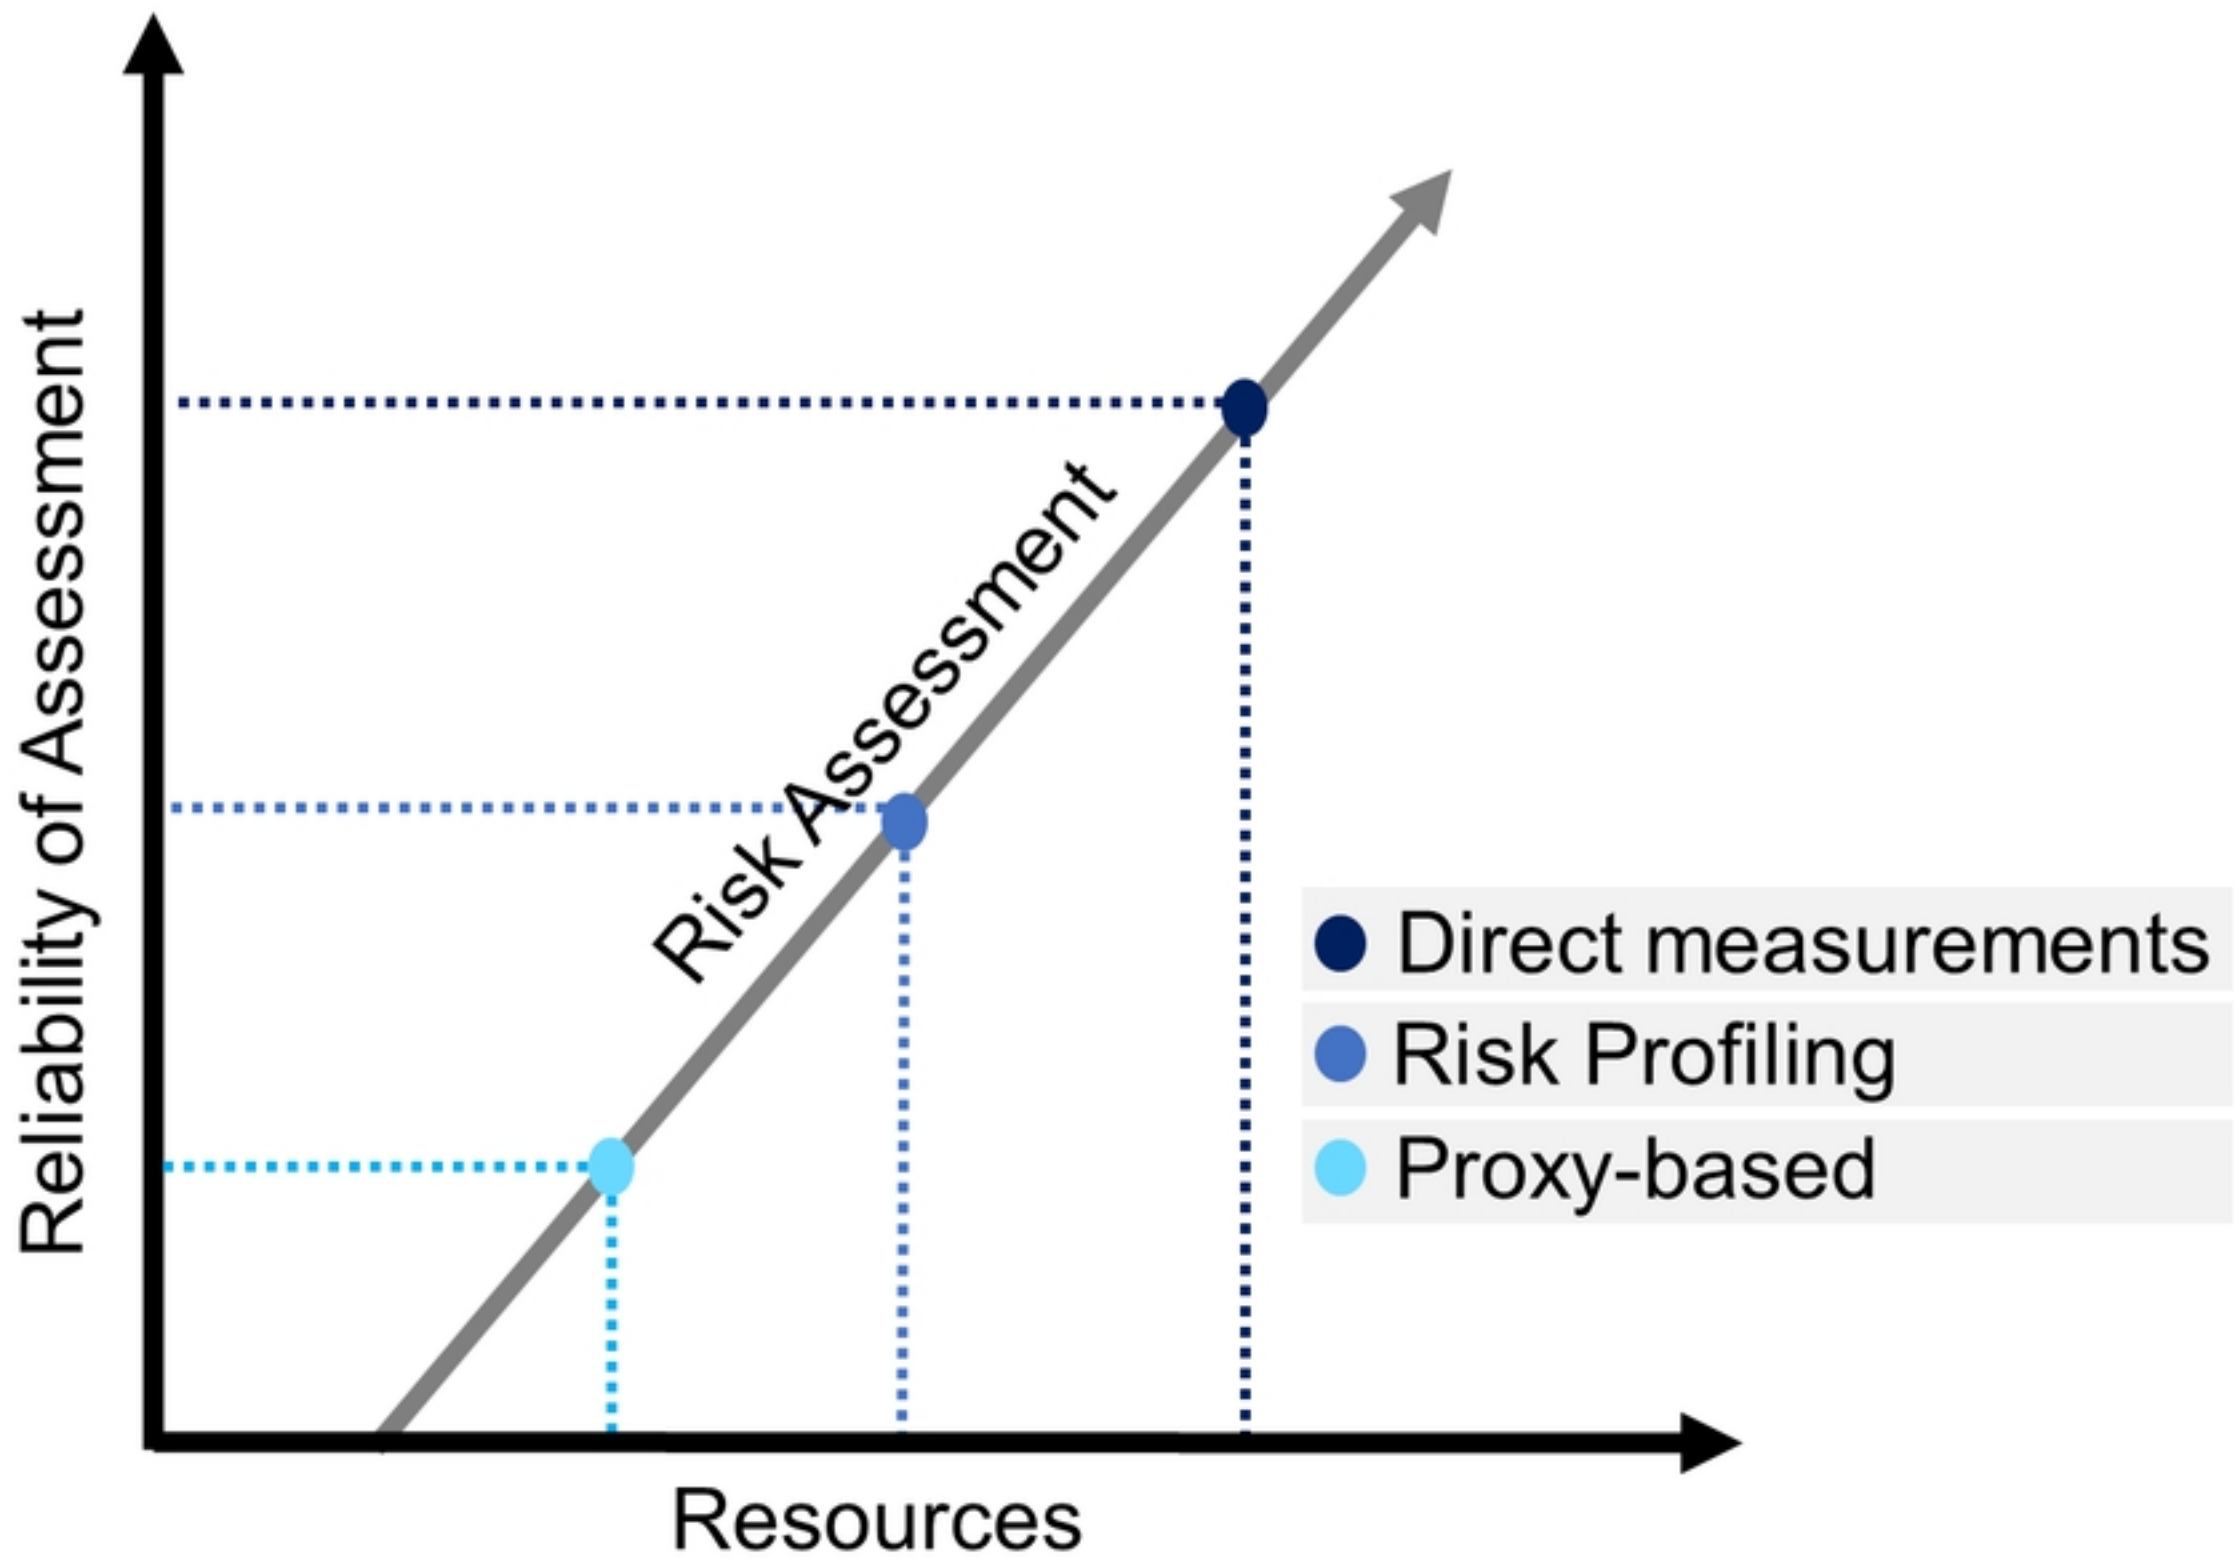

Figure 1

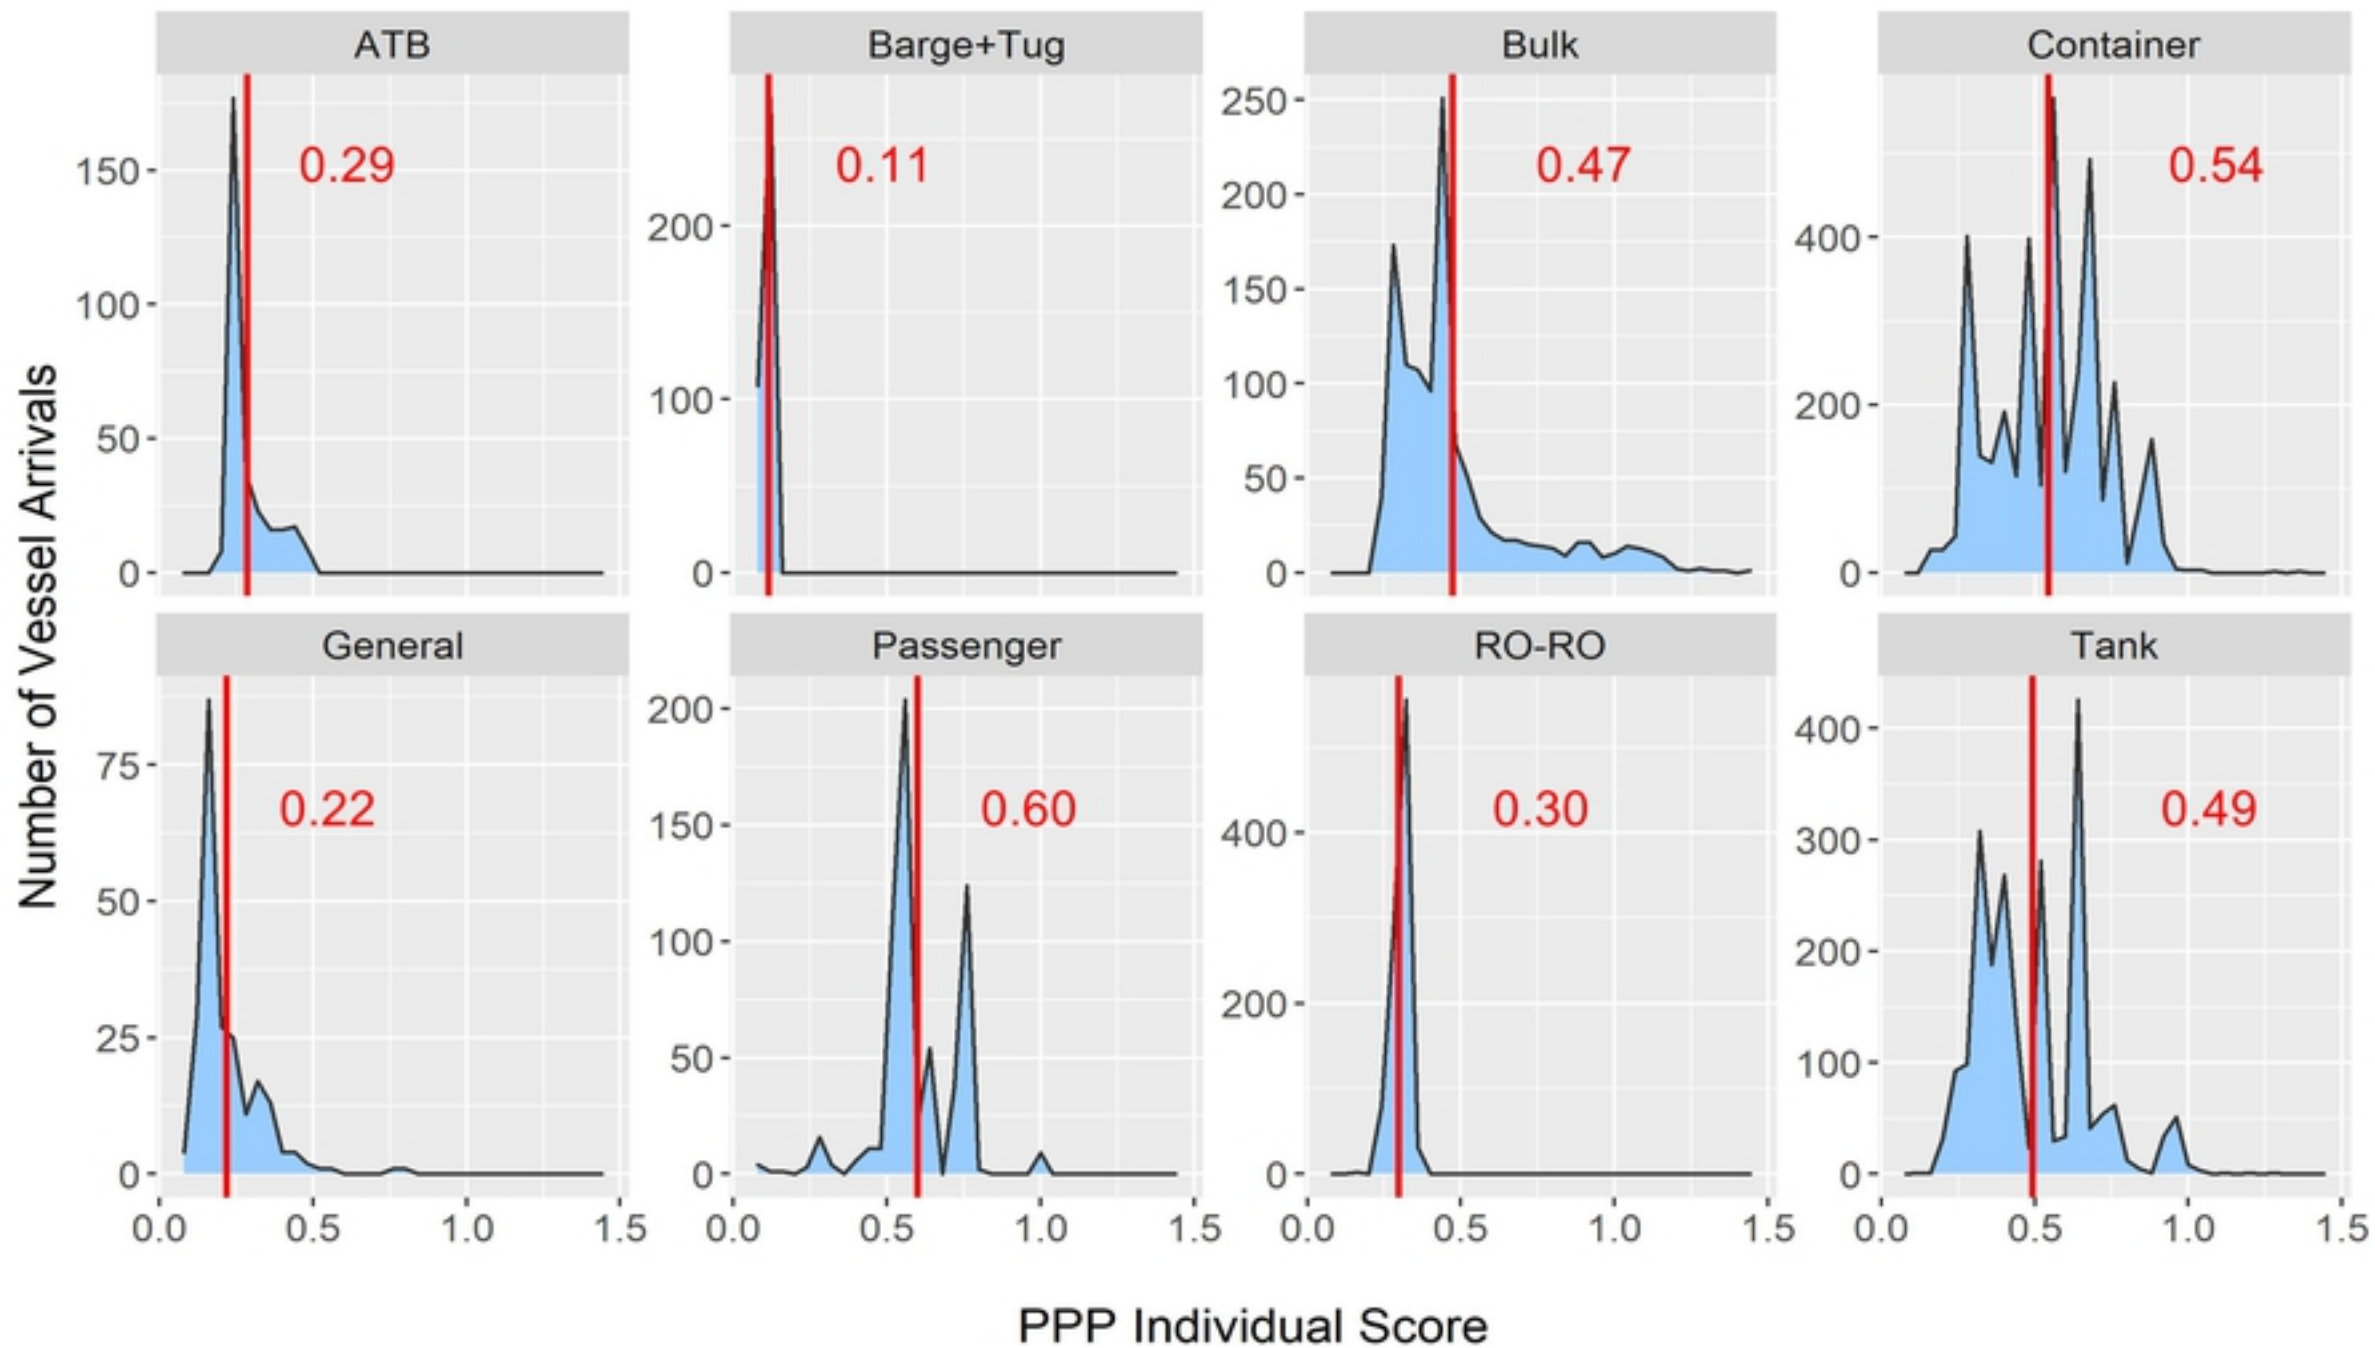

Figure 2

bioRxiv preprint doi: <https://doi.org/10.1101/2021.02.10.430588>; this version posted February 10, 2021. The copyright holder for this preprint (which was not certified by peer review) is the author/funder. This article is a US Government work. It is not subject to copyright under 17 USC 105 and is also made available for use under a CC0 license.

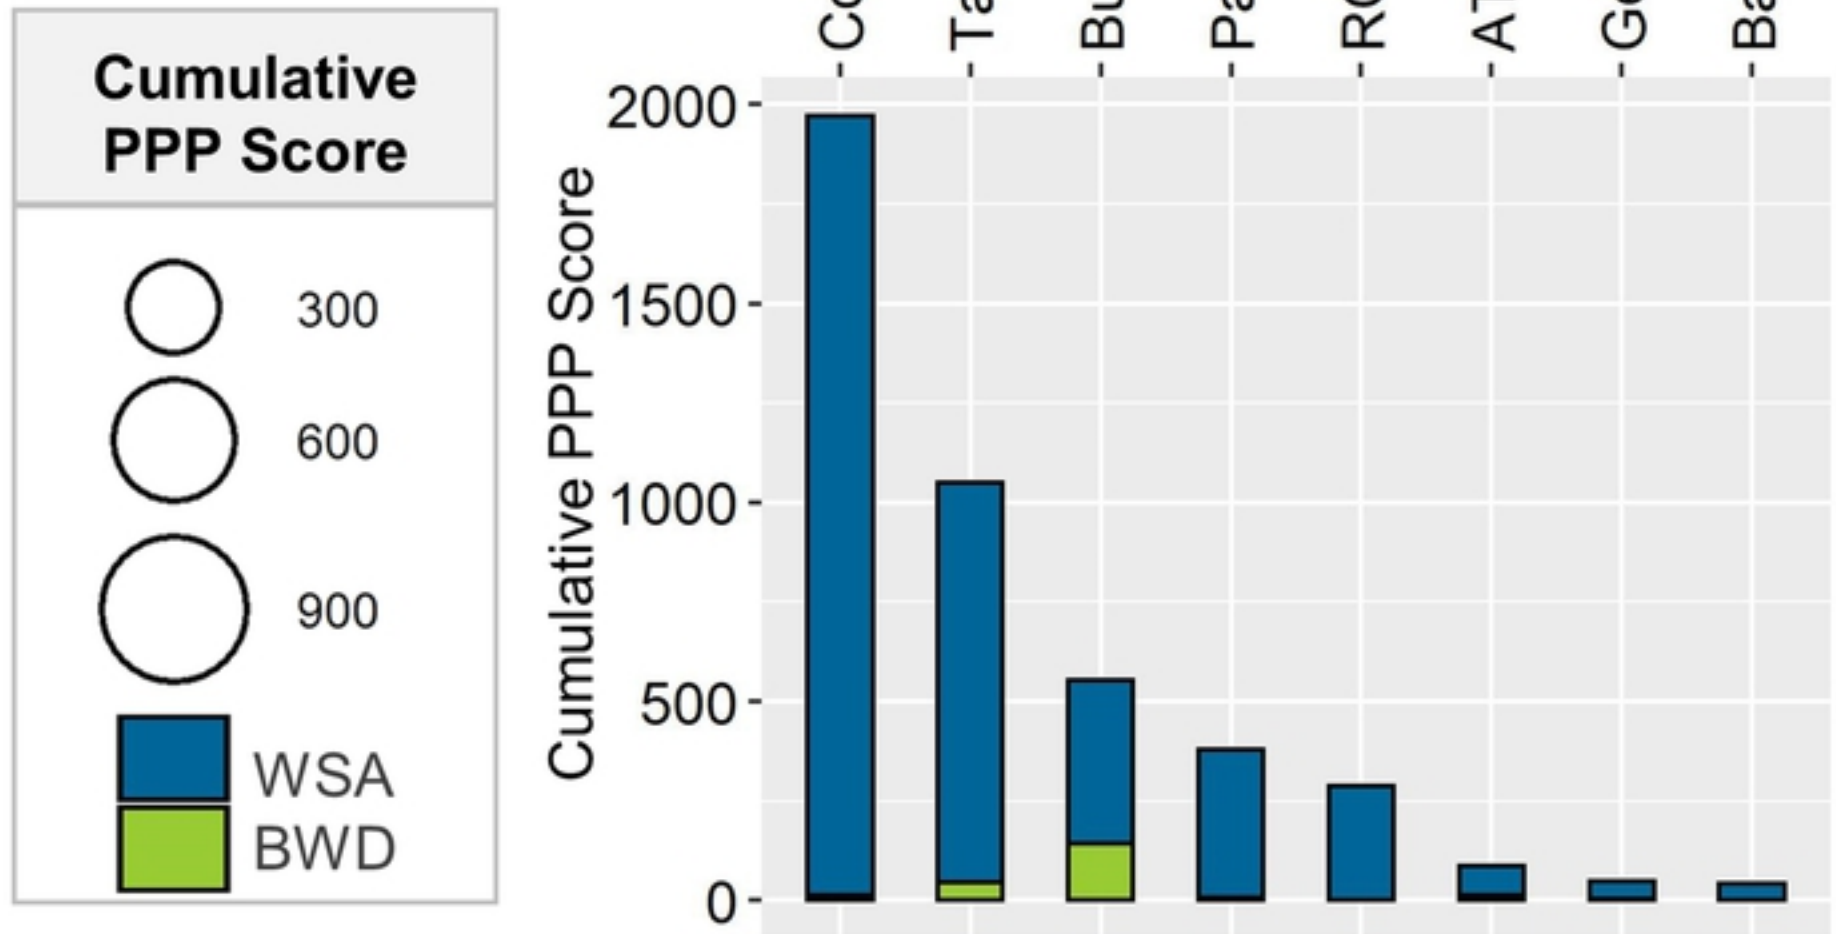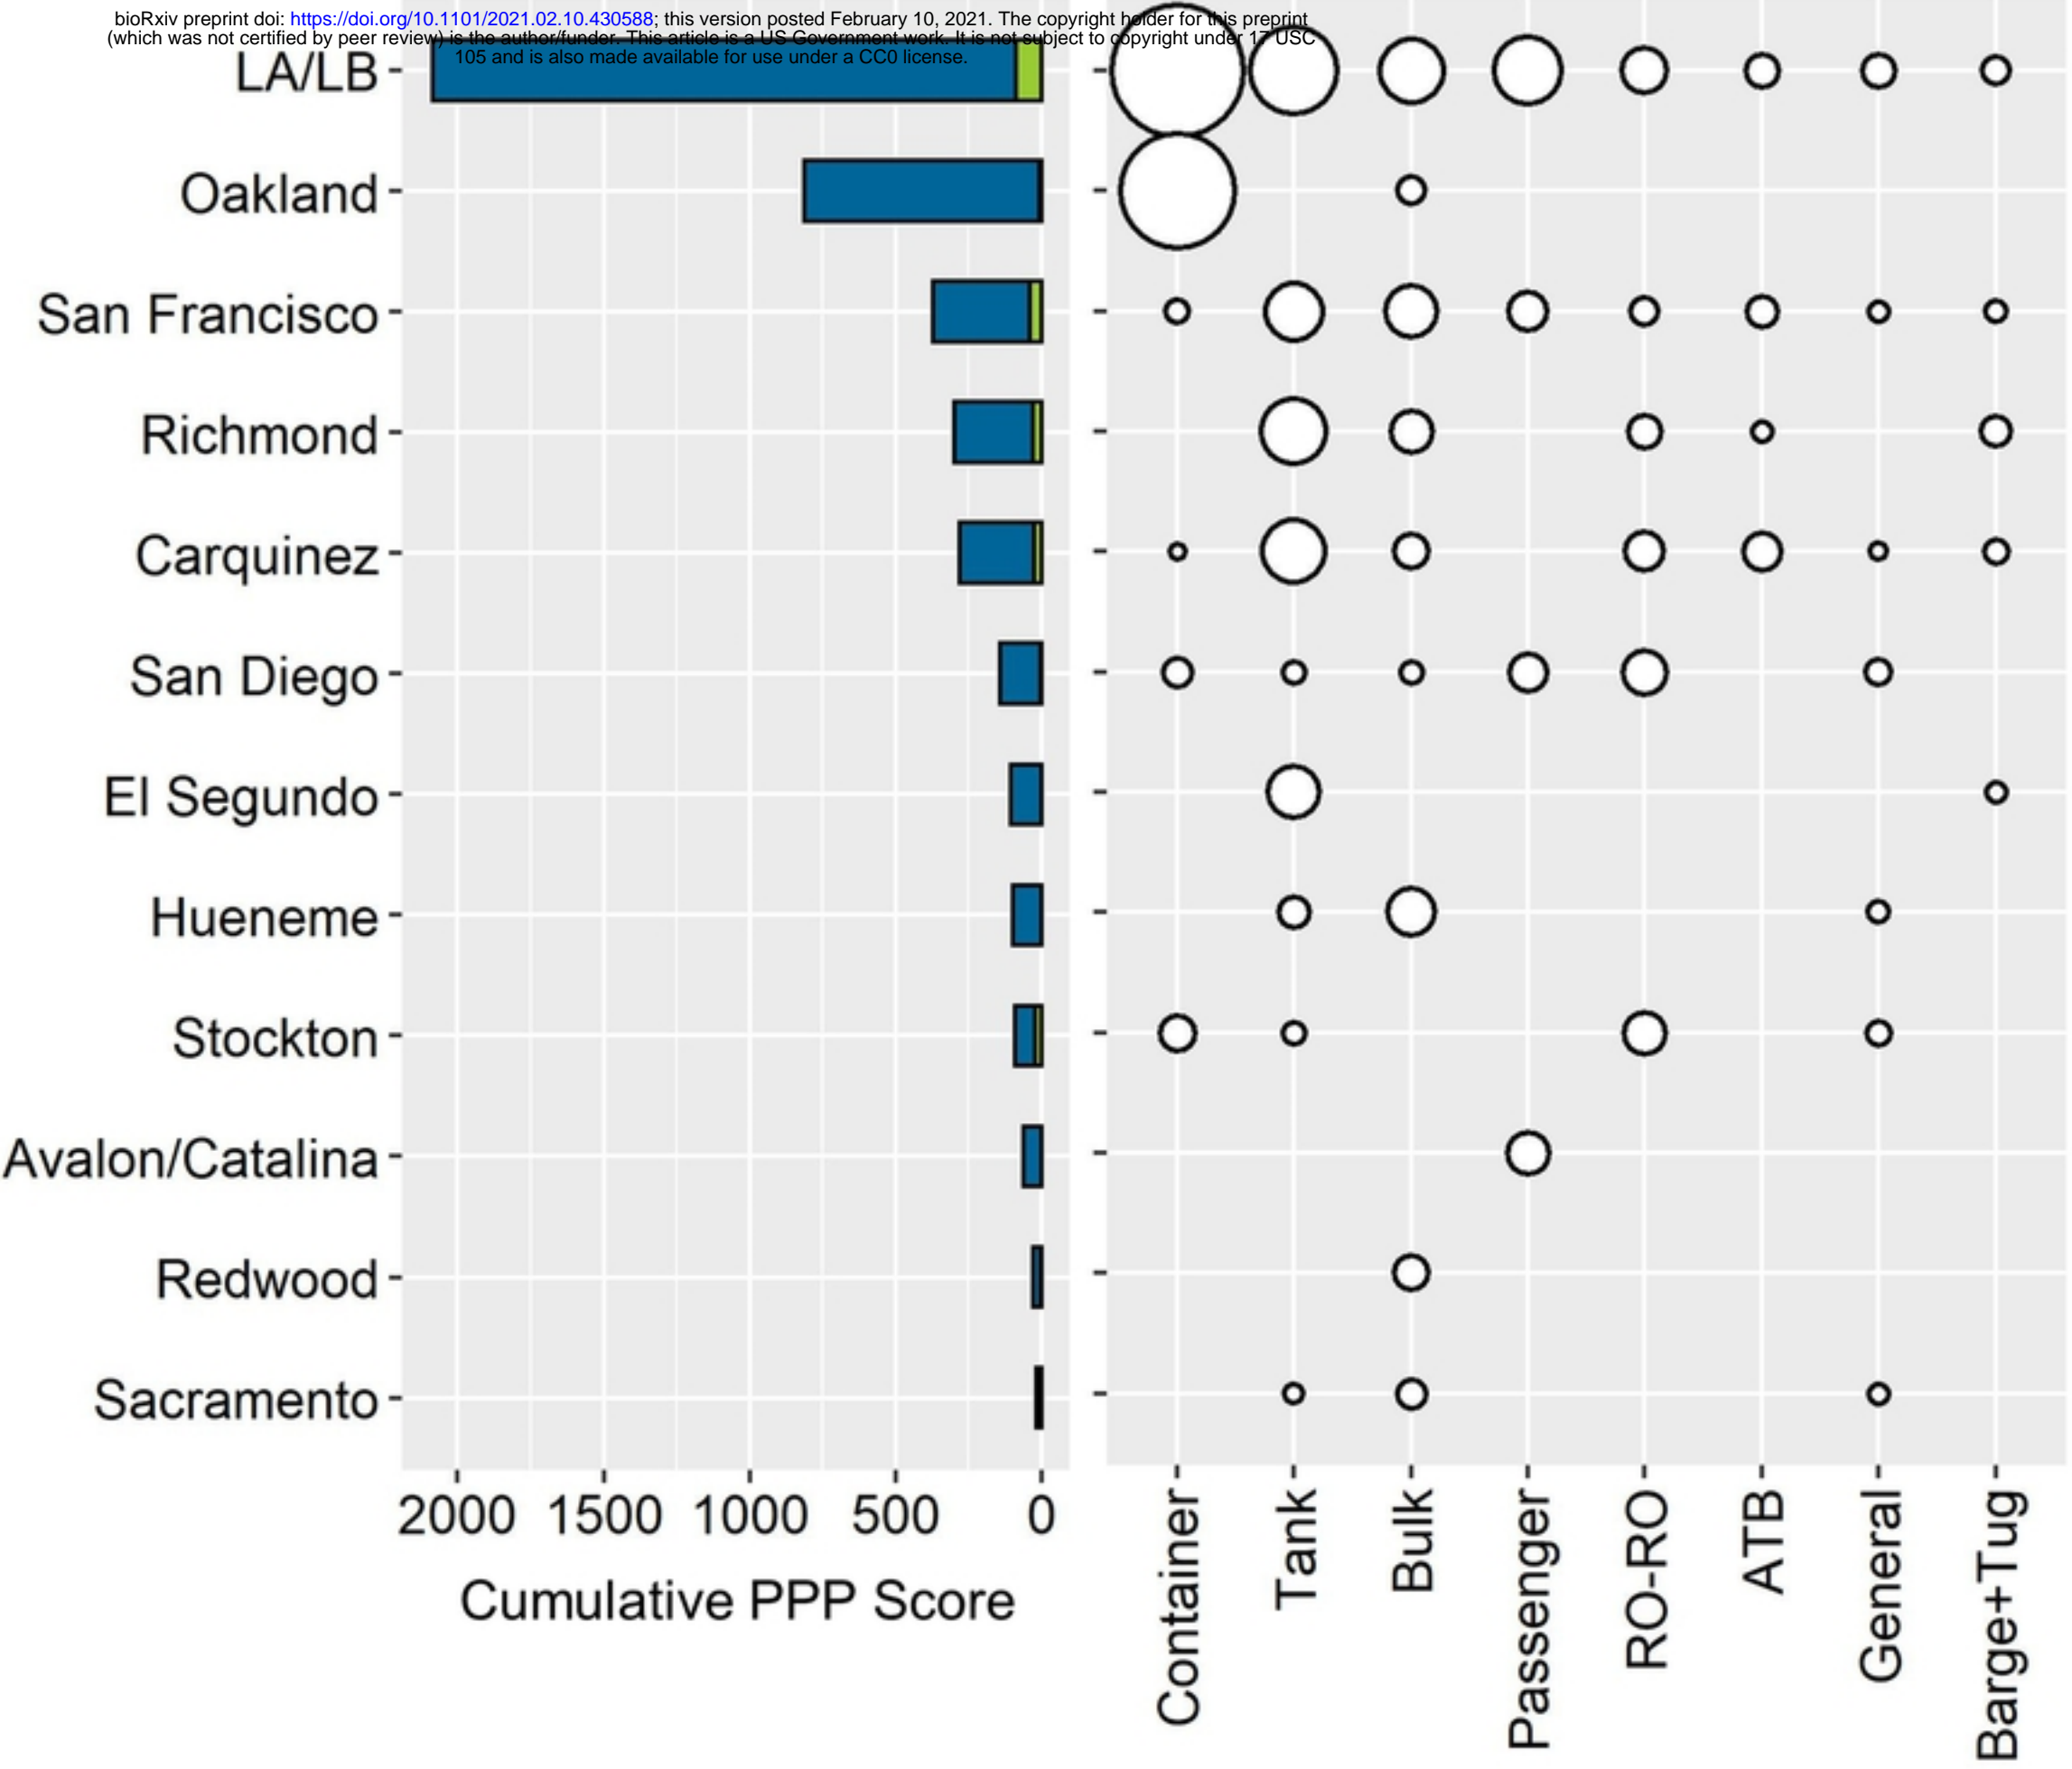

Figure 3
